# Supplementary material for: Low Temperature Activation of Tellurium and Resource‐Efficient Synthesis of AuTe2 and Ag2Te in Ionic Liquids
Source: PubMed Central journal article supplement — ChemistryOpen. 2020 Oct 19;10(2):117–24. doi: 10.1002/open.202000249 (PMC7874243; doi:10.1002/open.202000249), 2020-10-19
Supplement: OPEN-10-117-s001.pdf [file OPEN-10-117-s001.pdf]

# ChemistryOpen

Supporting Information

## **Low Temperature Activation of Tellurium and Resource-Efficient Synthesis of AuTe<sub>2</sub> and Ag<sub>2</sub>Te in Ionic Liquids**

Matthias A. Grasser, Tobias Pietsch, Eike Brunner, Thomas Doert, and Michael Ruck\*

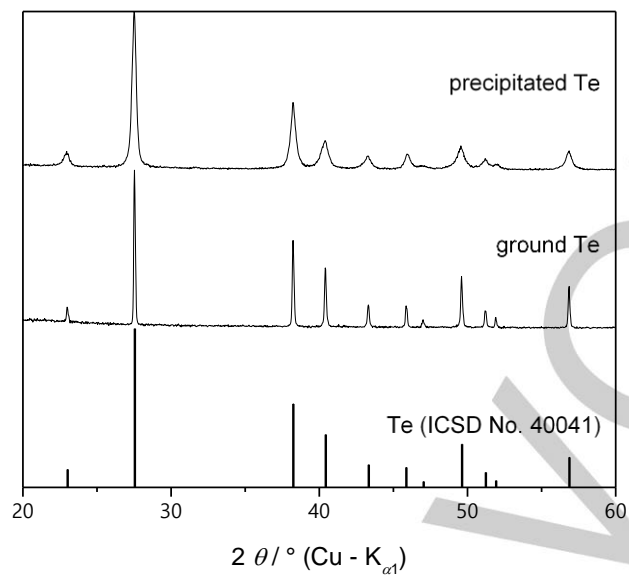

Figure S1. PXRD of with EtOH precipitated Te from reaction solution of  $[P_{66614}]Cl$  and Te for 16 h at 200 °C

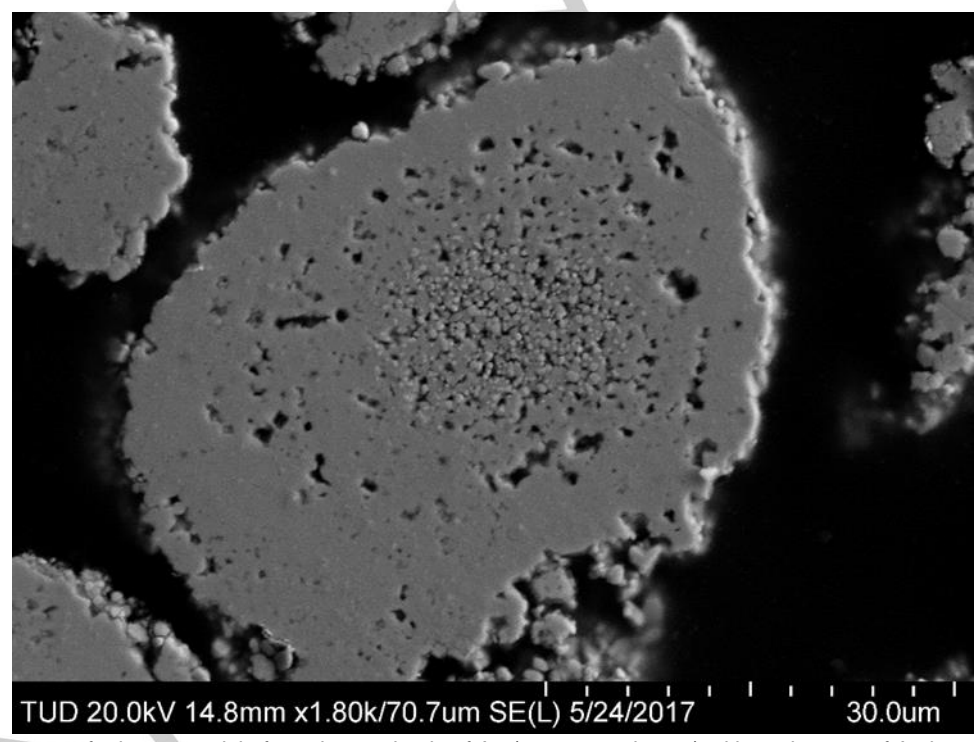

Figure S2. SEM images of a larger particle from the synthesis of Au (0.3 – 0.5 microns) with enclosures of Au in an shell of  $AuTe_2$

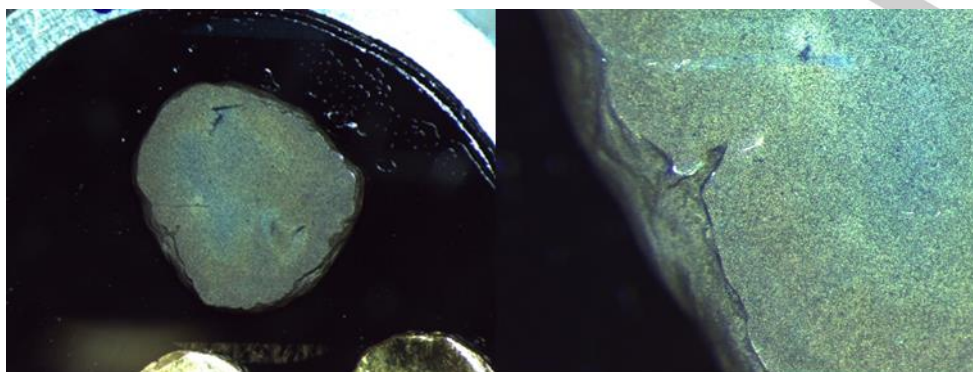

**Figure S3.** Microscopic picture of a gold flake which was in contact with Te and  $[P_{66614}]Cl$  at 200 °C for 16 h (passivation experiment), which formed a dark passivation layer of gold telluride (left) and scratched with a steel needle (right)

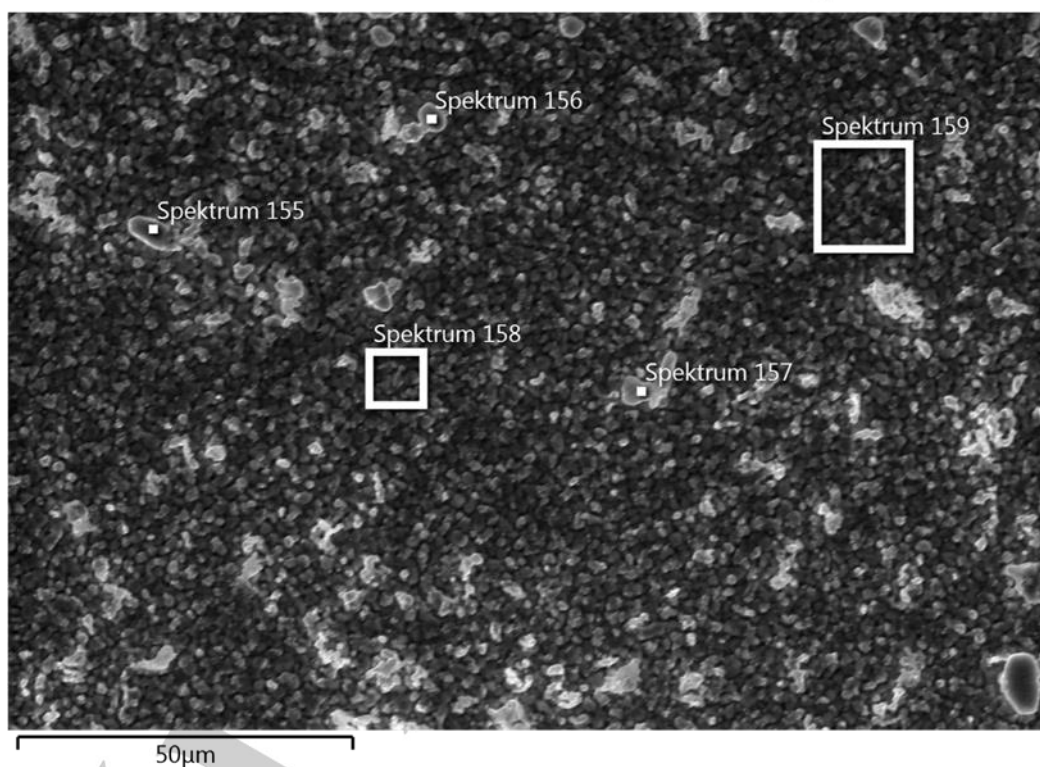

**Figure S4.** SEM image of the gold flake from S3. Small particles of Te are attached to the surface. EDX spectra were measured at the marked points and mapped over the area of the sketched windows. The elemental distribution is given in table S1. The spectra of the windows show  $AuTe_2$ .

**Table S1.** Elemental distribution determined by EDX at the marked points in figure S4

|     | Spektrum 155 | Spektrum 156 | Spektrum 157 | Spektrum 158 | Spektrum 159 |
|-----|--------------|--------------|--------------|--------------|--------------|
| Te  | 98.62        | 95.66        | 97.68        | 68.38        | 67.62        |
| Au  | 1.38         | 4.34         | 2.32         | 31.62        | 32.38        |
| Sum | 100.00       | 100.00       | 100.00       | 100.00       | 100.00       |

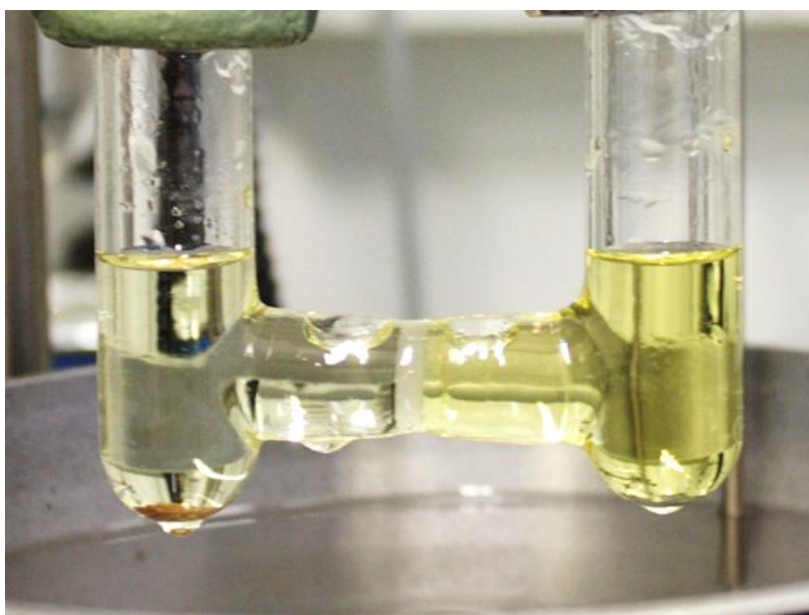

**Figure S5.** Picture of the diffusion experiment of Au (left side) and Te (right side) in  $[P_{6614}]Cl$  after one week at 200 °C.

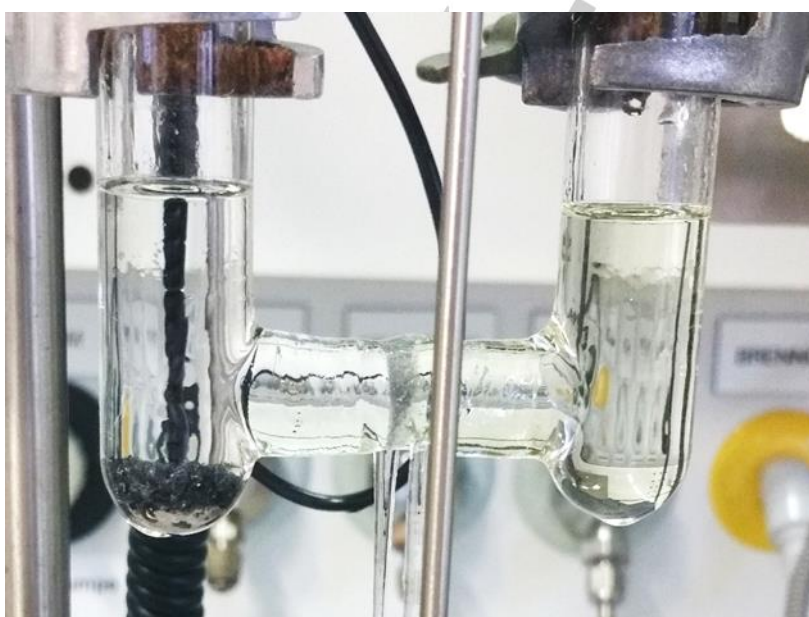

**Figure S6.** Picture of the diffusion experiment with needles of  $Ag_2Te$  grown on the the silver (left side) and Te (right side) in  $[P_{6614}]Cl$  after one week at 200 °C.

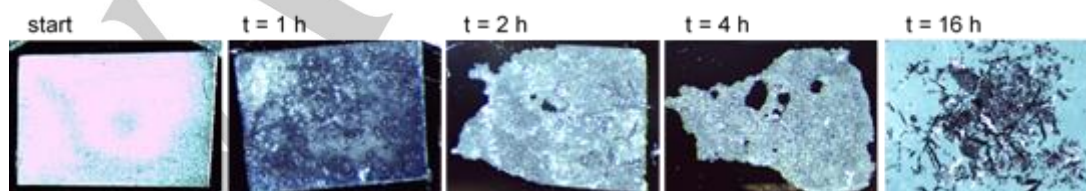

**Figure S7.** Passivation experiments of silver foil with Te in  $[P_{6614}]Cl$  at different reaction times (1 h, 2 h, 4 h, 16 h) with full structural disintegration of the silver plate after 16 h by formation of needles of  $Ag_2Te$

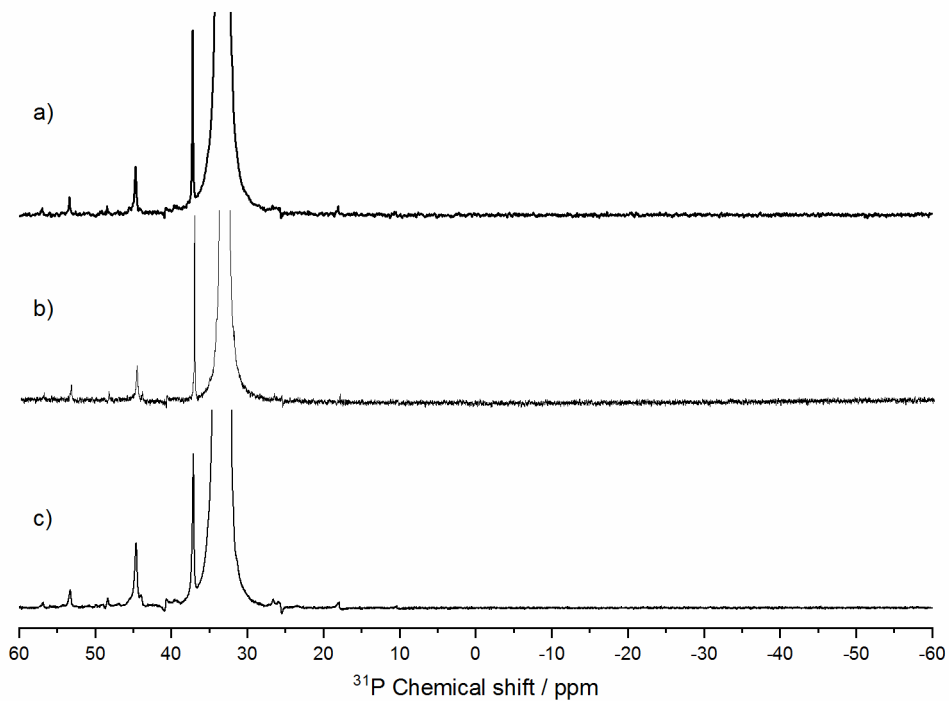

**Figure S8.**  $^{31}\text{P}$  NMR of a) untreated purified  $[\text{P}_{66614}]\text{Cl}$ , b) after the solvation of Te and c) after the synthesis of  $\text{Ag}_2\text{Te}$

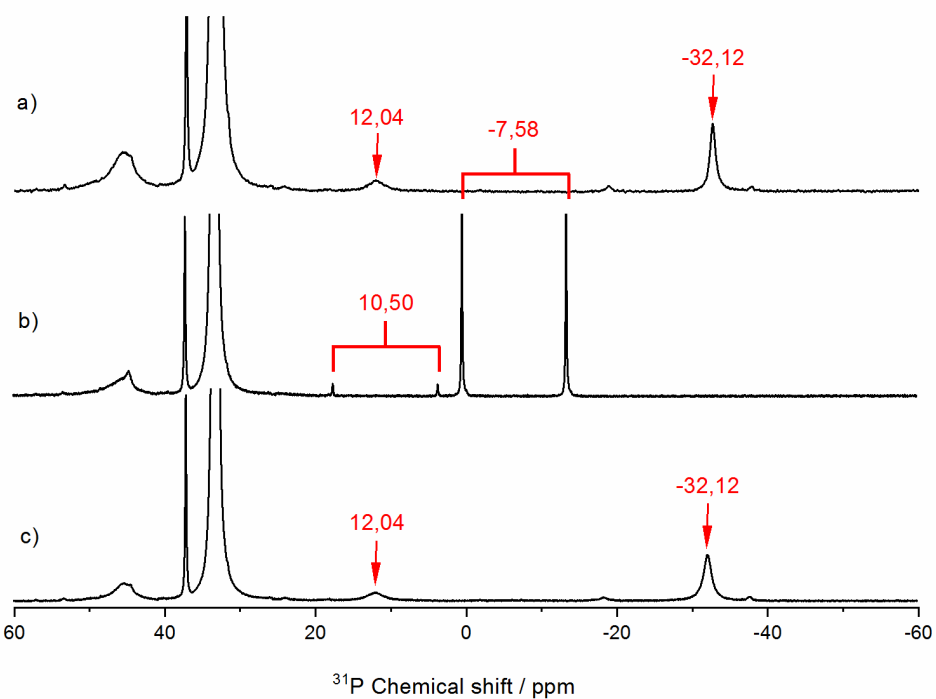

**Figure S9.**  $^{31}\text{P}$  NMR of a) untreated commercially available  $[\text{P}_{66614}]\text{Cl}$ , b) after the solvation of Te and c) after the synthesis of  $\text{Ag}_2\text{Te}$

### Additional EDX data:

Gold telluride:

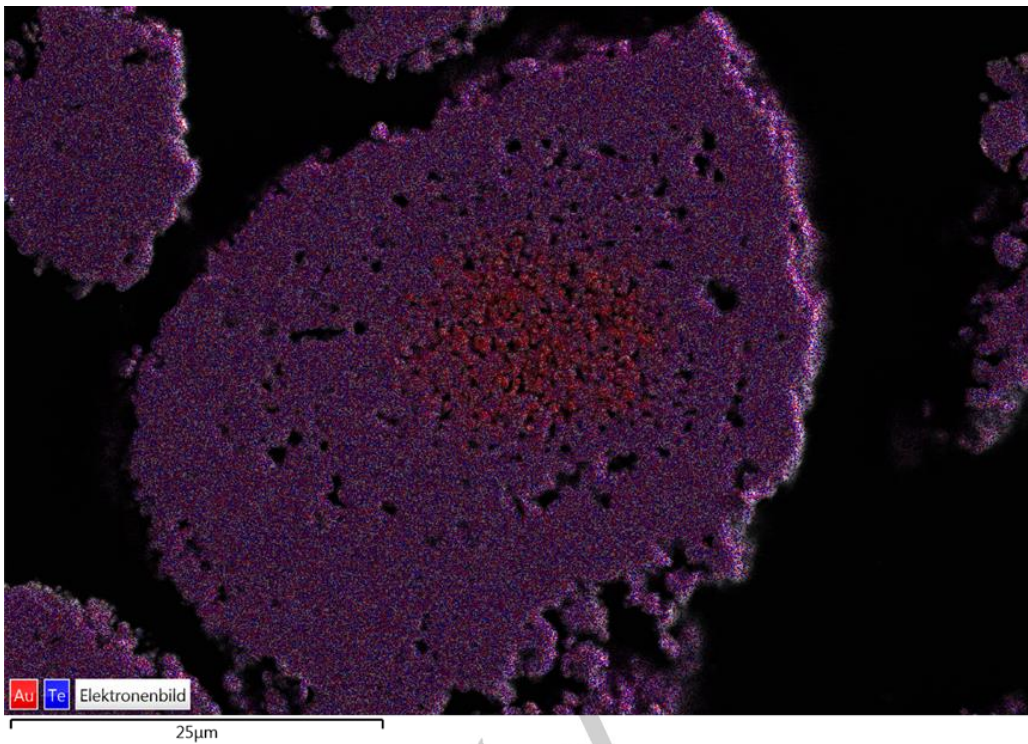

Figure S10. Overlay of EDX maps of a large particle from the synthesis (Au, Te powder, 200 °C, 16 h)

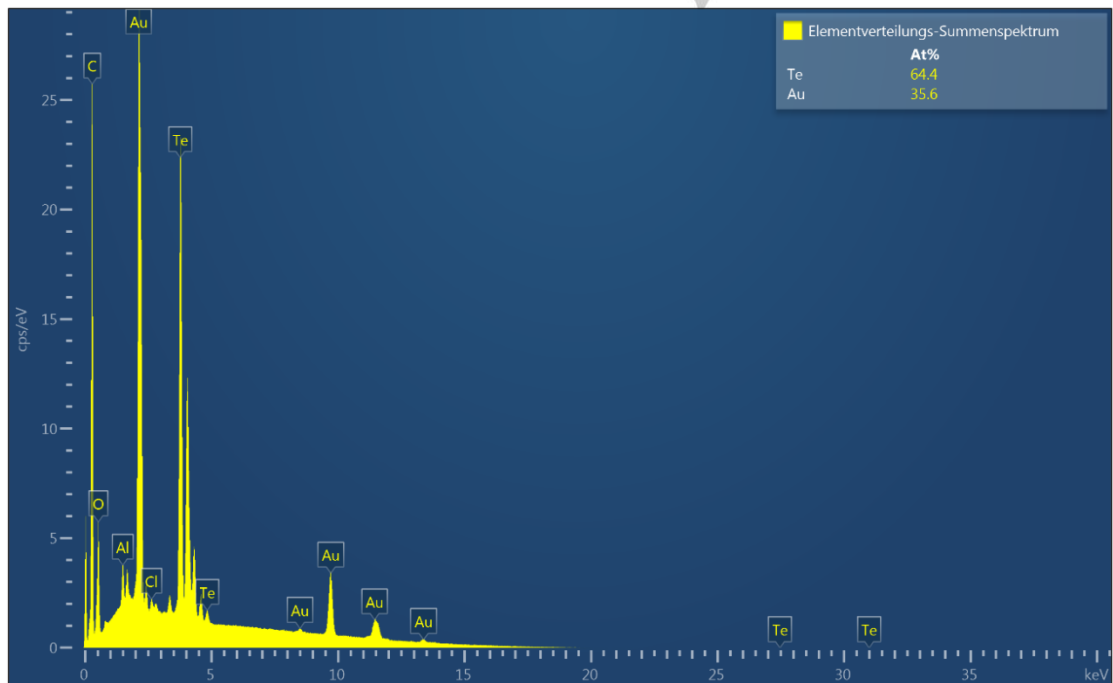

Figure S11. EDX sum spectra of S10

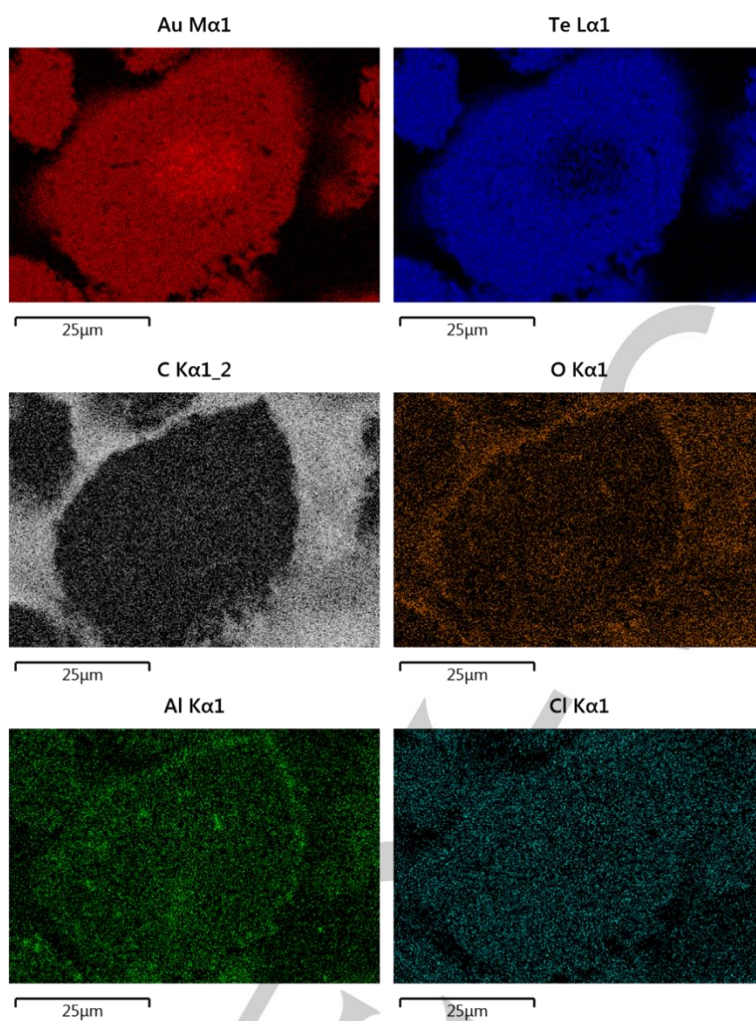

**Figure S12.** EDX maps of single Elements (Au, Te powder, 200 °C, 16 h)

Silver telluride

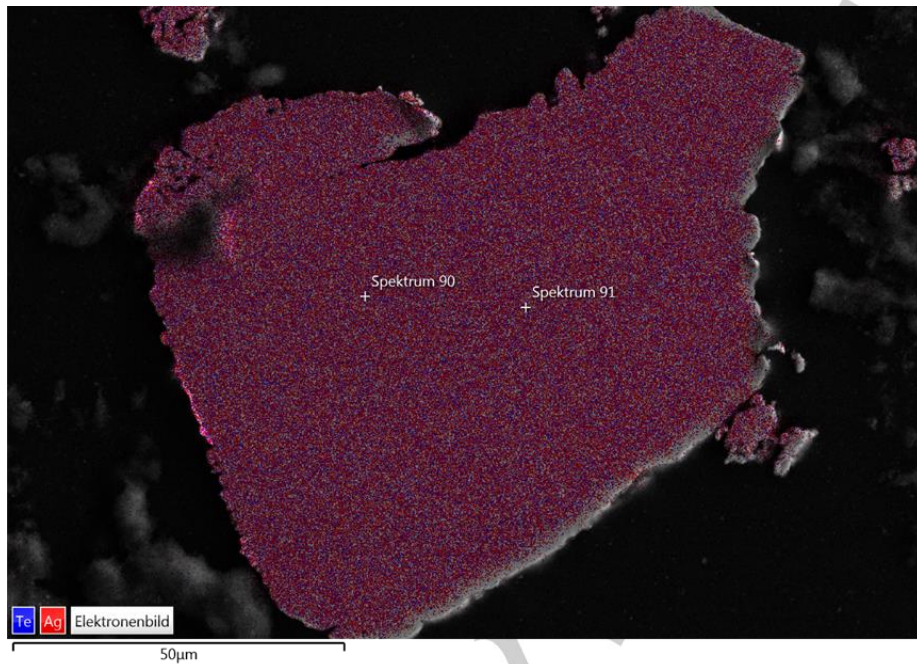

Figure S13. Overlay of EDX maps of a large particle from the synthesis (Ag, Te powder, 200 °C, 16 h)

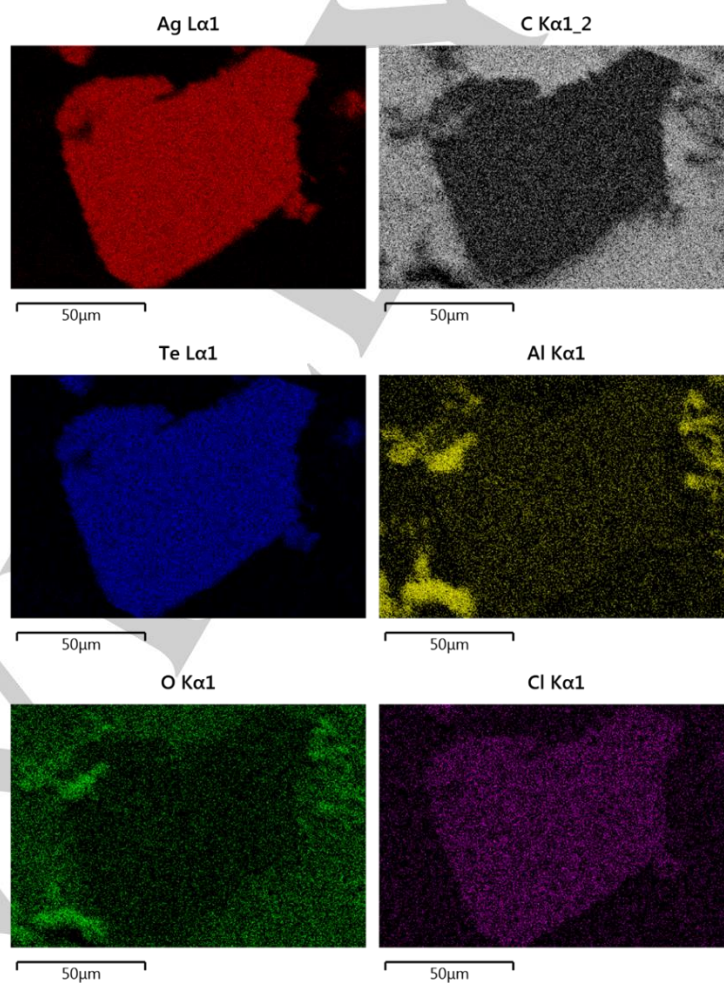

Figure S14. EDX maps of single Elements (Ag, Te powder, 200 °C, 16 h)



**Table S2.** Elemental distribution determined by EDX at the marked points in figure S4

|                    | EDX element spectra | Spektrum 90 | Spektrum 91 |
|--------------------|---------------------|-------------|-------------|
| Ag                 | 67.36               | 67.57       | 67.20       |
| Te                 | 32.64               | 32.43       | 32.80       |
| Sum                | 100.00              | 100.00      | 100.00      |
| Statistik          | Ag                  | Te          |             |
| Max                | 67.57               | 32.80       |             |
| Min                | 67.20               | 32.43       |             |
| Average            | 67.38               | 32.62       |             |
| Standard deviation | 0.18                | 0.18        |             |
